# Supplementary material
Source: PubMed Central journal article supplement (PMC3234877)
Supplement: supp_M111.292987_jbc.M111.292987-2.pdf [file supp_M111.292987_jbc.M111.292987-2.pdf]

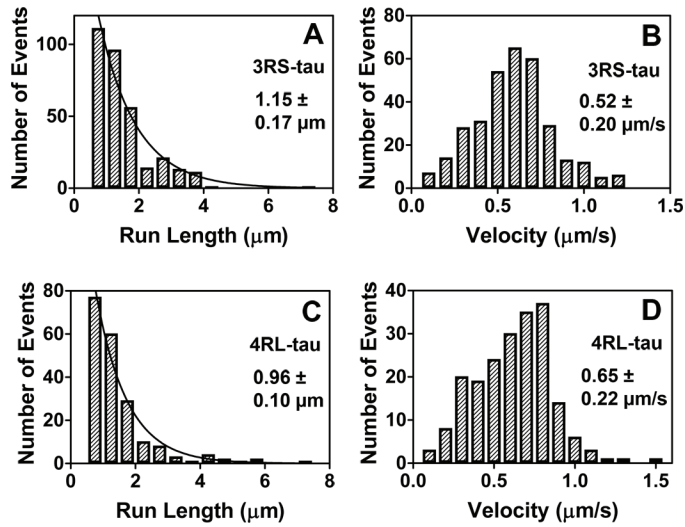

Figure S2. **Characteristic run length and velocity data of kinesin on GMPCPP-microtubules copolymerized with either 3RS-tau or 4RL-tau.** Qdot-kinesin complexes were tracked on unlabeled GMPCPP-microtubules that were formed by the addition of Alexa-488 labeled 3RS-tau or 4RL-tau (1:5 tau:tubulin ratio) to free tubulin prior to polymerization. Processive run length (plotted in  $0.5 \mu\text{m}$  bins) and velocity (plotted in  $0.1 \mu\text{m/s}$  bins) values were determined in the presence of Alexa-488 3RS-tau (A,B) or the presence of Alexa-488 4RL-tau (C,D). The resulting processive run length histograms were fit by a single exponential decay function describing the characteristic run length  $\pm$  standard error of the fit, while the Gaussian frequency distributions of the velocity data were used to calculate the mean velocity  $\pm$  standard deviation.
